# Supplementary material for: Resting-state fMRI signals contain spectral signatures of local hemodynamic response timing
Source: PubMed Central journal article supplement — bioRxiv. 2023 Jan 26:2023.01.25.525528. Preprint. [Version 1] doi: 10.1101/2023.01.25.525528 (PMC9900794; doi:10.1101/2023.01.25.525528), 2023-01-26
Supplement: NIHPP2023.01.25.525528v1-supplement-1.pdf [file NIHPP2023.01.25.525528v1-supplement-1.pdf]

# Supplementary Material

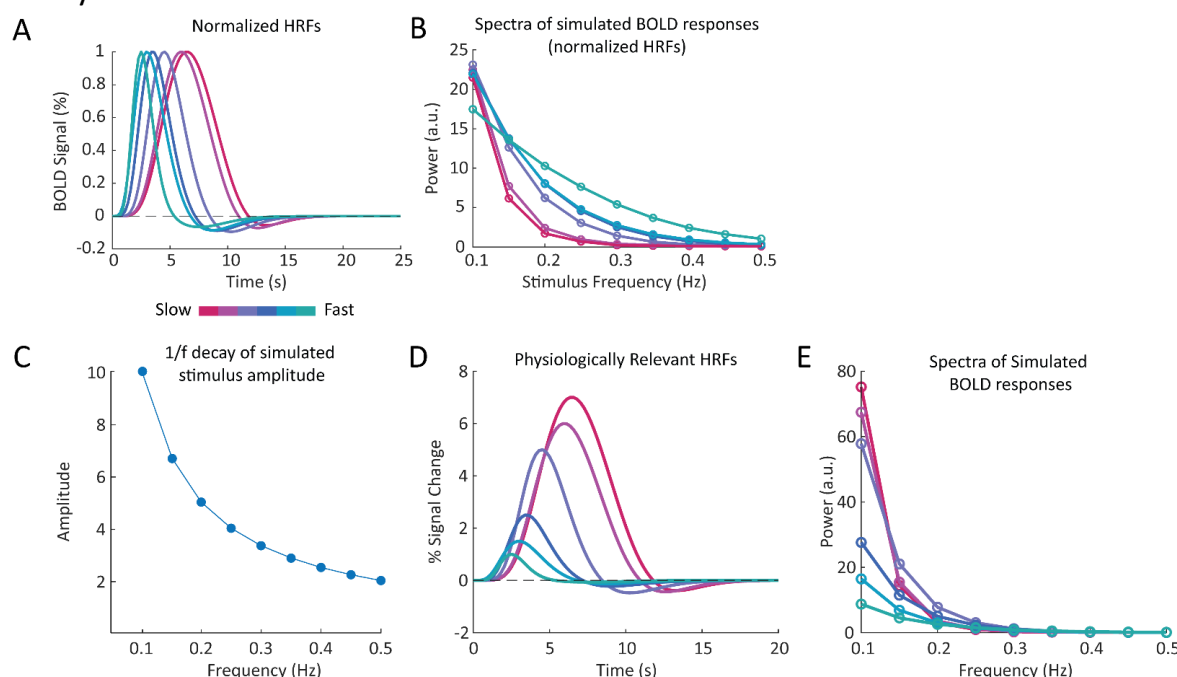

**Supplementary Figure S1 – Simulation results are robust to changes in HRF amplitude and 1/f decay of stimulus amplitude.** **A)** We normalized each HRF to its respective peak amplitude to examine effect on frequency spectra. **B)** The differences in spectral content of the BOLD signal are not simply due to the amplitude of each HRF but rather a signature of the temporal dynamics of the HRF, as the slope differences persist when normalizing for amplitude, with slower HRFs generating steeper frequency responses. **C)** Plot showing the magnitudes of the neural waveform at each frequency and their 1/f decay. **D)** Physiologically relevant HRFs used in simulations. **E)** Temporal properties of HRF noticeably affect the slope of the simulated spectra even when oscillation amplitudes decay with 1/f pattern, demonstrating that distinct slopes are expected for distinct HRFs regardless of the specific neural signal amplitude.

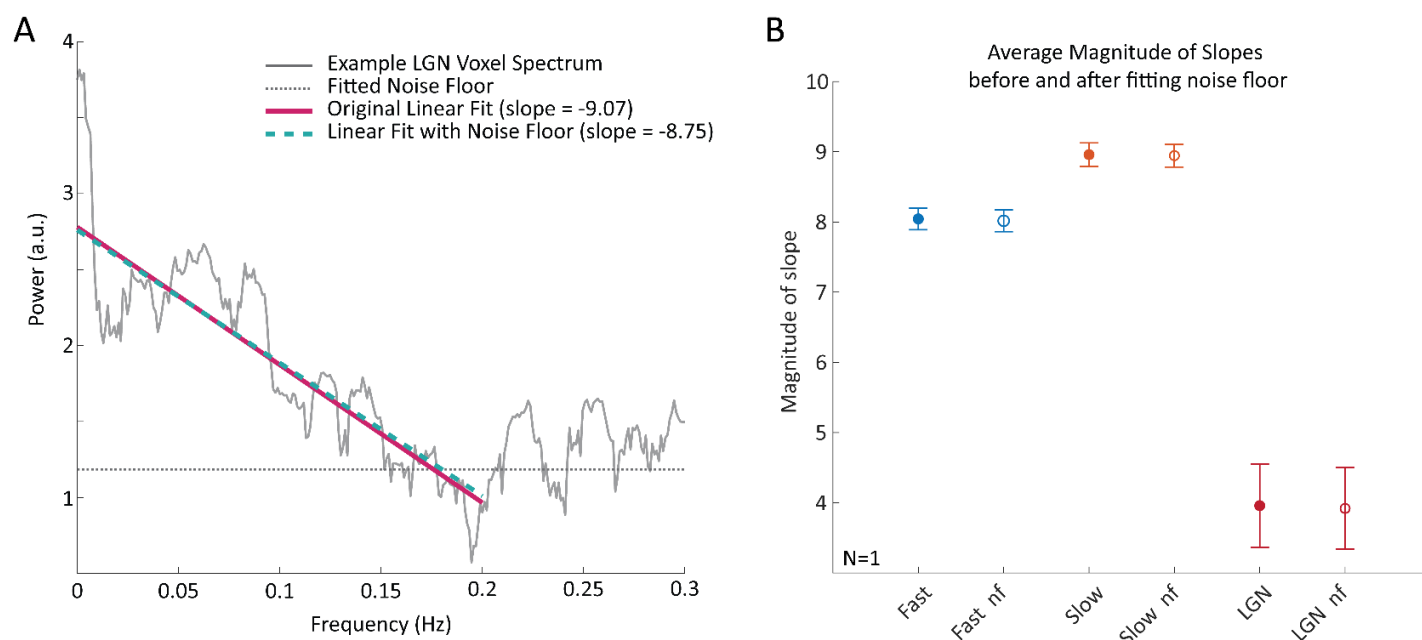

**Supplementary Figure S2 – Accounting for thermal noise does not significantly change the estimated slope of the frequency spectrum under 0.2 Hz in V1 or LGN voxels.** **A)** Spectra of example LGN voxel demonstrating the method for accounting for the noise floor in the slope of the linear fit. The original linear fit and the linear fit with the noise floor produce similar results. **B)** Average magnitude of slopes before and after fitting the noise floor in fast and slow cortical voxels as well as LGN voxels with error bars showing SEM. The within group averages did not significantly change when fitting for the noise floor versus not.

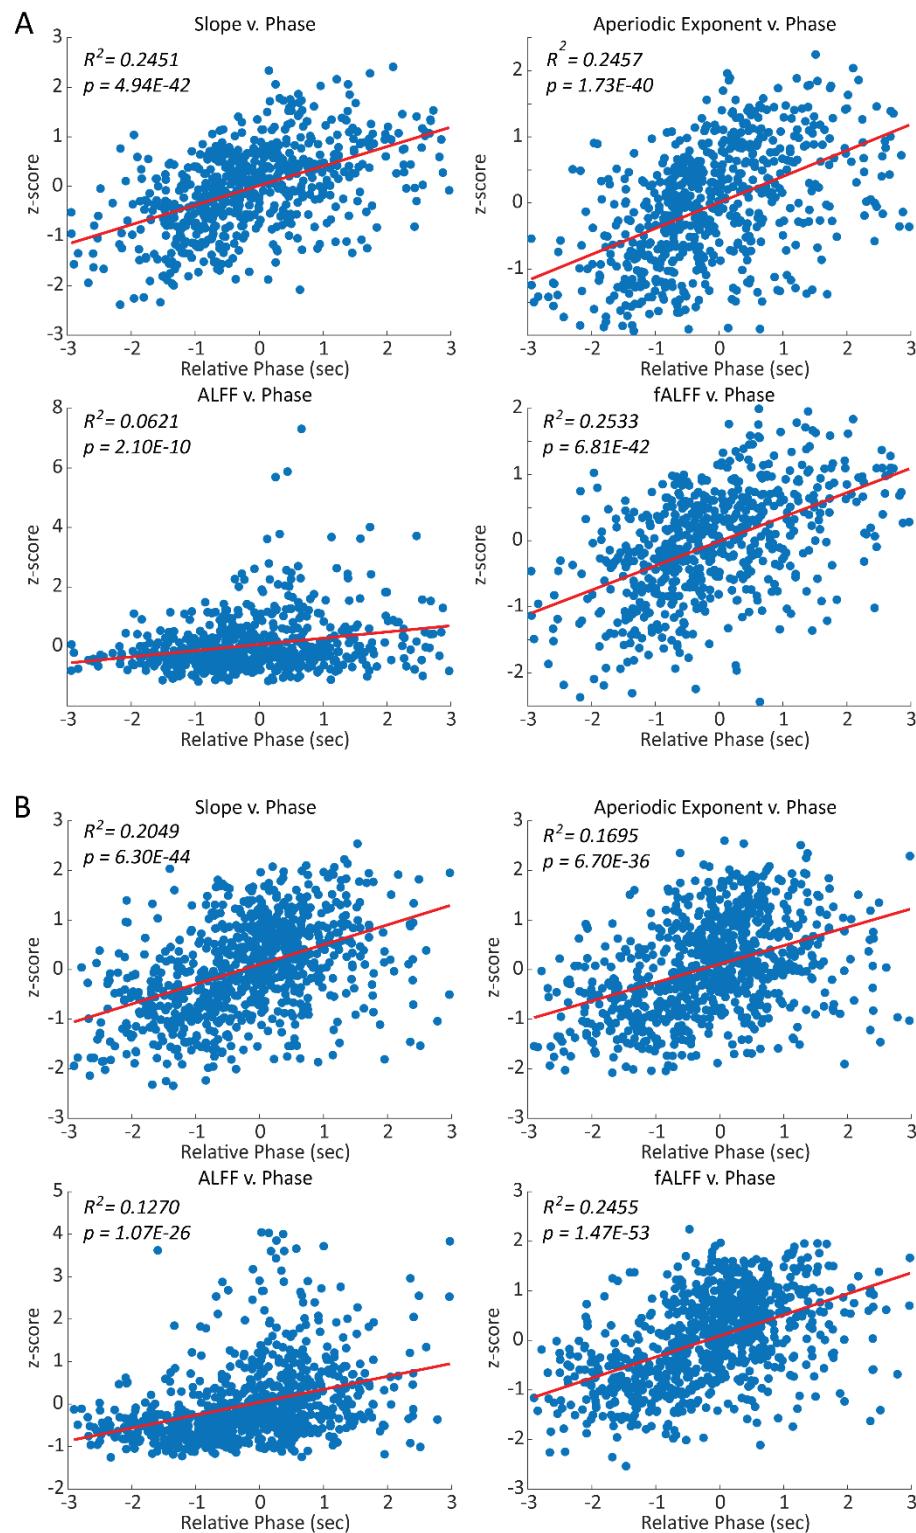

*Supplementary Figure S3 – Example subjects showing significant ( $p < 0.05$ ) correlations between each spectral feature and phase on a voxel-wise basis. Each point represents a single voxel, red-line shows linear fit. p-values are from a linear hypothesis test on the model coefficients. **A)** Example subject showing significant, positive correlations between each spectral feature and the magnitude of the phase. **B)** A second example subject also showing a significant, positive correlation between each spectral feature (except ALFF) and the magnitude of the phase.*
